# Supplementary material
Source: MDPI journal article supplement (https://www.mdpi.com/2073-4352/1/4/215)
Supplement: s1 [file s1]

#=============================================================================
_audit_creation_method            SHELXL
#=============================================================================

# PROCESSING SUMMARY

_journal_date_recd_electronic     ?
_journal_date_from_coeditor       ?
_journal_date_accepted            ?
_journal_coeditor_code            ?

# SUBMISSION DETAILS

_publ_contact_author_name
;
        Prof. Dr. G. Meyer
;

_publ_contact_author_address
;
        Institut f\"ur Anorganische Chemie
        Universit\"at zu K\"oln
        Greinstra\&se 6
        D-50939 K\"oln
        Germany
;

_publ_contact_author_phone      '+49 221 470 3262'
_publ_contact_author_fax        '+49 221 470 4899'
_publ_contact_author_email      'ac118@uni-koeln.de'

_publ_requested_category        FM
_publ_requested_journal         ?
_publ_requested_coeditor_name   ?

_publ_contact_letter
;
Please consider this CIF submission for publication as a regular structural 
paper in Crystals. 
;

# TITEL AND AUTHOR LIST

_publ_section_title
;

? 

;
_publ_section_title_footnote     
;

;

loop_
 _publ_author_name
 _publ_author_address

        'Walbaum, Christine'
;
        Institut f\"ur Anorganische Chemie
        Universit\"at zu K\"oln
        Greinstra\&se 6
        D-50939 K\"oln
        Germany
;
       'Pantenburg, Ingo'
;
        Institut f\"ur Anorganische Chemie
        Universit\"at zu K\"oln
        Greinstra\&se 6
        D-50939 K\"oln
        Germany
;

       'Meyer, Gerd'
;
        Institut f\"ur Anorganische Chemie
        Universit\"at zu K\"oln
        Greinstra\&se 6
        D-50939 K\"oln
        Germany
;
  
 
data_cw136
 
_audit_creation_method            SHELXL-97
_chemical_name_systematic
;
 ?
;
_chemical_name_common             ?
_chemical_melting_point           ?
_chemical_formula_moiety          'C24 H32 O8, I2'
_chemical_formula_sum
 'C24 H32 I2 O8'
_chemical_formula_weight          702.30
 
loop_
 _atom_type_symbol
 _atom_type_description
 _atom_type_scat_dispersion_real
 _atom_type_scat_dispersion_imag
 _atom_type_scat_source
 'C'  'C'   0.0033   0.0016
 'International Tables Vol C Tables 4.2.6.8 and 6.1.1.4'
 'H'  'H'   0.0000   0.0000
 'International Tables Vol C Tables 4.2.6.8 and 6.1.1.4'
 'O'  'O'   0.0106   0.0060
 'International Tables Vol C Tables 4.2.6.8 and 6.1.1.4'
 'I'  'I'  -0.4742   1.8119
 'International Tables Vol C Tables 4.2.6.8 and 6.1.1.4'
 
_symmetry_cell_setting            triclinic
_symmetry_space_group_name_H-M    'P -1'
_symmetry_space_group_name_Hall    '-P 1'

 
loop_
 _symmetry_equiv_pos_as_xyz
 'x, y, z'
 '-x, -y, -z'
 
_cell_length_a                    4.8499(11)
_cell_length_b                    12.037(3)
_cell_length_c                    12.804(2)
_cell_angle_alpha                 64.561(15)
_cell_angle_beta                  86.815(17)
_cell_angle_gamma                 83.893(17)
_cell_volume                      671.1(2)
_cell_formula_units_Z             1
_cell_measurement_temperature     293(2)
_cell_measurement_reflns_used     5536
_cell_measurement_theta_min       1.76
_cell_measurement_theta_max       29.66
 
_exptl_crystal_description        collumn
_exptl_crystal_colour             red
_exptl_crystal_size_max           0.3
_exptl_crystal_size_mid           0.3
_exptl_crystal_size_min           0.3
_exptl_crystal_density_meas       'not measured'
_exptl_crystal_density_diffrn     1.738
_exptl_crystal_density_method     'not measured'
_exptl_crystal_F_000              346
_exptl_absorpt_coefficient_mu     2.387
_exptl_absorpt_correction_type    numerical
_exptl_absorpt_correction_T_min   0.5359
_exptl_absorpt_correction_T_max   0.7874
_exptl_absorpt_process_details    
;
The absorption correction (X-RED; Stoe & Cie, 2001)
was performed after optimizing the crystal shape
using X-SHAPE (Stoe & Cie, 1999).
;
 
_exptl_special_details
;
 ?
;
 
_diffrn_ambient_temperature       293(2)
_diffrn_radiation_wavelength      0.71073
_diffrn_radiation_type            MoK\a
_diffrn_radiation_source          'fine-focus sealed tube'
_diffrn_radiation_monochromator   graphite
_diffrn_measurement_device_type   'IPDS II (Stoe & Cie)'
_diffrn_measurement_method        '\w and \f scans'
_diffrn_detector_area_resol_mean  'not measured'
_diffrn_standards_number          'not measured'
_diffrn_standards_interval_count  'not measured'
_diffrn_standards_interval_time   'not measured'
_diffrn_standards_decay_%         'not measured'
_diffrn_reflns_number             13396
_diffrn_reflns_av_R_equivalents   0.0446
_diffrn_reflns_av_sigmaI/netI     0.0540
_diffrn_reflns_limit_h_min        -5
_diffrn_reflns_limit_h_max        6
_diffrn_reflns_limit_k_min        -16
_diffrn_reflns_limit_k_max        16
_diffrn_reflns_limit_l_min        -17
_diffrn_reflns_limit_l_max        17
_diffrn_reflns_theta_min          1.76
_diffrn_reflns_theta_max          29.66
_reflns_number_total              3765
_reflns_number_gt                 1965
_reflns_threshold_expression      >2sigma(I)
 
_computing_data_collection        ?
_computing_cell_refinement        ?
_computing_data_reduction         ?
_computing_structure_solution     ?
_computing_structure_refinement   'SHELXL-97 (Sheldrick, 1997)'
_computing_molecular_graphics     ?
_computing_publication_material   ?
 
_refine_special_details
;
 Refinement of F^2^ against ALL reflections.  The weighted R-factor wR and
 goodness of fit S are based on F^2^, conventional R-factors R are based
 on F, with F set to zero for negative F^2^. The threshold expression of
 F^2^ > 2sigma(F^2^) is used only for calculating R-factors(gt) etc. and is
 not relevant to the choice of reflections for refinement.  R-factors based
 on F^2^ are statistically about twice as large as those based on F, and R-
 factors based on ALL data will be even larger.
;
 
_refine_ls_structure_factor_coef  Fsqd
_refine_ls_matrix_type            full
_refine_ls_weighting_scheme       calc
_refine_ls_weighting_details
 'calc w=1/[\s^2^(Fo^2^)+(0.0377P)^2^+0.0000P] where P=(Fo^2^+2Fc^2^)/3'
_atom_sites_solution_primary      direct
_atom_sites_solution_secondary    difmap
_atom_sites_solution_hydrogens    geom
_refine_ls_hydrogen_treatment     constr
_refine_ls_extinction_method      SHELXL
_refine_ls_extinction_coef        'not measured'
_refine_ls_extinction_expression
 'Fc^*^=kFc[1+0.001xFc^2^\l^3^/sin(2\q)]^-1/4^'
_refine_ls_number_reflns          3765
_refine_ls_number_parameters      157
_refine_ls_number_restraints      0
_refine_ls_R_factor_all           0.0804
_refine_ls_R_factor_gt            0.0301
_refine_ls_wR_factor_ref          0.0751
_refine_ls_wR_factor_gt           0.0625
_refine_ls_goodness_of_fit_ref    0.835
_refine_ls_restrained_S_all       0.835
_refine_ls_shift/su_max           0.002
_refine_ls_shift/su_mean          0.000
 
loop_
 _atom_site_label
 _atom_site_type_symbol
 _atom_site_fract_x
 _atom_site_fract_y
 _atom_site_fract_z
 _atom_site_U_iso_or_equiv
 _atom_site_adp_type
 _atom_site_occupancy
 _atom_site_symmetry_multiplicity
 _atom_site_calc_flag
 _atom_site_refinement_flags
 _atom_site_disorder_assembly
 _atom_site_disorder_group
I1 I 0.95821(7) -0.52957(3) 1.41265(2) 0.06788(13) Uani 1 1 d . . .
O4 O 0.8827(6) -0.6376(2) 1.2515(2) 0.0655(7) Uani 1 1 d . . .
O1 O 0.7483(5) -0.8678(2) 1.23802(19) 0.0528(6) Uani 1 1 d . . .
O10 O 0.5675(5) -0.1379(2) 0.92057(19) 0.0555(6) Uani 1 1 d . . .
O7 O 0.7943(6) -0.3747(2) 1.0986(2) 0.0733(8) Uani 1 1 d . . .
C16 C 0.3984(7) -0.0309(3) 0.7313(3) 0.0456(7) Uani 1 1 d . . .
C11 C 0.5698(7) -0.0343(3) 0.8169(3) 0.0451(7) Uani 1 1 d . . .
C2 C 0.9112(8) -0.8624(3) 1.3249(3) 0.0558(9) Uani 1 1 d . . .
H00A H 1.0459 -0.9340 1.3549 0.071(3) Uiso 1 1 calc R . .
H00B H 0.7931 -0.8617 1.3884 0.071(3) Uiso 1 1 calc R . .
C3 C 1.0563(8) -0.7466(4) 1.2711(4) 0.0632(10) Uani 1 1 d . . .
H00C H 1.2065 -0.7532 1.3210 0.071(3) Uiso 1 1 calc R . .
H00D H 1.1375 -0.7397 1.1978 0.071(3) Uiso 1 1 calc R . .
C12 C 0.7276(8) 0.0632(3) 0.7937(3) 0.0558(9) Uani 1 1 d . . .
H010 H 0.8447 0.0612 0.8497 0.077(6) Uiso 1 1 calc R . .
C14 C 0.5410(8) 0.1690(3) 0.6038(3) 0.0631(10) Uani 1 1 d . . .
H011 H 0.5286 0.2379 0.5328 0.077(6) Uiso 1 1 calc R . .
C15 C 0.3846(8) 0.0705(3) 0.6252(3) 0.0576(9) Uani 1 1 d . . .
H012 H 0.2708 0.0731 0.5680 0.077(6) Uiso 1 1 calc R . .
C13 C 0.7102(9) 0.1643(3) 0.6858(3) 0.0638(10) Uani 1 1 d . . .
H013 H 0.8170 0.2295 0.6703 0.077(6) Uiso 1 1 calc R . .
C5 C 0.7368(9) -0.5836(3) 1.1469(3) 0.0629(10) Uani 1 1 d . . .
H01A H 0.5992 -0.6369 1.1478 0.071(3) Uiso 1 1 calc R . .
H01B H 0.8640 -0.5733 1.0828 0.071(3) Uiso 1 1 calc R . .
C6 C 0.5985(9) -0.4615(4) 1.1316(4) 0.0695(11) Uani 1 1 d . . .
H01C H 0.4572 -0.4345 1.0729 0.071(3) Uiso 1 1 calc R . .
H01D H 0.5091 -0.4684 1.2036 0.071(3) Uiso 1 1 calc R . .
C8 C 0.7047(11) -0.2659(3) 1.1126(3) 0.0737(12) Uani 1 1 d . . .
H01E H 0.8003 -0.2662 1.1772 0.071(3) Uiso 1 1 calc R . .
H01F H 0.5074 -0.2643 1.1298 0.071(3) Uiso 1 1 calc R . .
C9 C 0.7610(9) -0.1530(3) 1.0057(3) 0.0615(10) Uani 1 1 d . . .
H01G H 0.7422 -0.0812 1.0224 0.071(3) Uiso 1 1 calc R . .
H01H H 0.9485 -0.1621 0.9780 0.071(3) Uiso 1 1 calc R . .
 
loop_
 _atom_site_aniso_label
 _atom_site_aniso_U_11
 _atom_site_aniso_U_22
 _atom_site_aniso_U_33
 _atom_site_aniso_U_23
 _atom_site_aniso_U_13
 _atom_site_aniso_U_12
I1 0.0930(2) 0.06316(17) 0.04721(14) -0.02027(10) -0.00849(11) -0.01641(13)
O4 0.0864(19) 0.0615(15) 0.0564(14) -0.0345(12) -0.0222(13) 0.0132(14)
O1 0.0565(15) 0.0527(13) 0.0498(12) -0.0200(10) -0.0067(11) -0.0125(11)
O10 0.0672(16) 0.0502(13) 0.0458(12) -0.0149(10) -0.0070(11) -0.0130(12)
O7 0.090(2) 0.0483(14) 0.0784(18) -0.0257(13) 0.0134(16) -0.0067(14)
C16 0.0422(19) 0.0441(17) 0.0502(17) -0.0207(14) 0.0029(15) -0.0016(15)
C11 0.049(2) 0.0407(16) 0.0458(16) -0.0196(13) 0.0029(14) -0.0018(15)
C2 0.053(2) 0.063(2) 0.0555(19) -0.0300(17) -0.0082(17) -0.0008(18)
C3 0.060(2) 0.069(2) 0.073(2) -0.040(2) -0.0141(19) -0.003(2)
C12 0.061(2) 0.0509(19) 0.058(2) -0.0247(16) 0.0028(18) -0.0124(17)
C14 0.067(3) 0.0470(19) 0.058(2) -0.0077(16) 0.007(2) -0.0030(18)
C15 0.052(2) 0.060(2) 0.0511(19) -0.0161(16) -0.0042(17) 0.0022(18)
C13 0.066(3) 0.049(2) 0.073(2) -0.0232(18) 0.013(2) -0.0141(19)
C5 0.074(3) 0.061(2) 0.058(2) -0.0258(17) -0.0115(19) -0.016(2)
C6 0.065(3) 0.075(3) 0.066(2) -0.027(2) -0.021(2) 0.000(2)
C8 0.109(4) 0.057(2) 0.051(2) -0.0223(17) -0.007(2) 0.004(2)
C9 0.084(3) 0.0506(19) 0.0543(19) -0.0262(16) -0.0163(19) 0.0000(19)
 
_geom_special_details
;
 All esds (except the esd in the dihedral angle between two l.s. planes)
 are estimated using the full covariance matrix.  The cell esds are taken
 into account individually in the estimation of esds in distances, angles
 and torsion angles; correlations between esds in cell parameters are only
 used when they are defined by crystal symmetry.  An approximate (isotropic)
 treatment of cell esds is used for estimating esds involving l.s. planes.
;
 
loop_
 _geom_bond_atom_site_label_1
 _geom_bond_atom_site_label_2
 _geom_bond_distance
 _geom_bond_site_symmetry_2
 _geom_bond_publ_flag
I1 I1 2.6839(7) 2_748 ?
O4 C5 1.407(4) . ?
O4 C3 1.414(5) . ?
O1 C16 1.374(4) 2_647 ?
O1 C2 1.427(4) . ?
O10 C11 1.377(4) . ?
O10 C9 1.417(4) . ?
O7 C6 1.399(5) . ?
O7 C8 1.417(5) . ?
C16 O1 1.374(4) 2_647 ?
C16 C15 1.381(5) . ?
C16 C11 1.397(5) . ?
C11 C12 1.384(5) . ?
C2 C3 1.497(5) . ?
C12 C13 1.394(5) . ?
C14 C13 1.348(5) . ?
C14 C15 1.395(5) . ?
C5 C6 1.485(6) . ?
C8 C9 1.494(5) . ?
 
loop_
 _geom_angle_atom_site_label_1
 _geom_angle_atom_site_label_2
 _geom_angle_atom_site_label_3
 _geom_angle
 _geom_angle_site_symmetry_1
 _geom_angle_site_symmetry_3
 _geom_angle_publ_flag
C5 O4 C3 116.0(3) . . ?
C16 O1 C2 117.7(3) 2_647 . ?
C11 O10 C9 118.1(3) . . ?
C6 O7 C8 114.6(3) . . ?
O1 C16 C15 125.0(3) 2_647 . ?
O1 C16 C11 115.4(3) 2_647 . ?
C15 C16 C11 119.7(3) . . ?
O10 C11 C12 124.7(3) . . ?
O10 C11 C16 115.8(3) . . ?
C12 C11 C16 119.5(3) . . ?
O1 C2 C3 108.1(3) . . ?
O4 C3 C2 114.2(3) . . ?
C11 C12 C13 119.7(4) . . ?
C13 C14 C15 120.0(3) . . ?
C16 C15 C14 120.2(4) . . ?
C14 C13 C12 121.0(3) . . ?
O4 C5 C6 109.3(3) . . ?
O7 C6 C5 109.8(3) . . ?
O7 C8 C9 111.1(3) . . ?
O10 C9 C8 108.3(3) . . ?
 
_diffrn_measured_fraction_theta_max    0.991
_diffrn_reflns_theta_full              29.66
_diffrn_measured_fraction_theta_full   0.991
_refine_diff_density_max    0.641
_refine_diff_density_min   -0.993
_refine_diff_density_rms    0.079
